# Supplementary material
Source: PubMed Central journal article supplement (PMC2668000)
Supplement: mmc1.pdf [file mmc1.pdf]

## A Multiplex Human Syndrome Implicates a Key Role

### for Intestinal Cell Kinase in Development

### of Central Nervous, Skeletal, and Endocrine Systems

Piya Lahiry, Jian Wang, John F. Robinson, Jacob P. Turowec, David W. Litchfield, Matthew Lanktree, Gregory B. Gloor, Erik G. Puffenberger, Kevin A. Strauss, Mildred B. Martens, David A. Ramsay, C. Anthony Rugar, Victoria Siu, and Robert A. Hegele

**Table S1. Variations found in directly sequenced genes.**

| Gene symbol      | Gene name                               | No. of exons | Variation site                                  | dbSNP ID                         | AA/splice site change <sup>a,b</sup>                                                                                | Notes <sup>c</sup>                                                               |
|------------------|-----------------------------------------|--------------|-------------------------------------------------|----------------------------------|---------------------------------------------------------------------------------------------------------------------|----------------------------------------------------------------------------------|
| <i>IL17F</i>     | interleukin 17F                         | 3            | E3, c.228A>G                                    | rs11465553                       | CAT-H; CGT-R; H161R; probably damaging                                                                              | U:AA, A:AA, C:AA, Con:GG                                                         |
| <i>LOC647163</i> | similar to intestinal mucin-2 precursor | 2            | IVS2, +94A>G<br>E2, c.15C>A                     | rs875142<br>n/a                  | n/a<br>CGC-R; AGC-S; R61S; this change is benign (Polyphen) **                                                      | U:GG, A:GG, C:GG, Con:AA<br>U:TT, A:TT, C:TT, Con:GG                             |
| <i>EFHC1</i>     | EF-hand domain (C') containing 1        | 11           | E3, c.190C>T<br>E3, c.260G>A                    | n/a<br>n/a                       | CGG-R; TGG-W; R159W; this variant is possibly damaging<br>CGC-R; CAC-H; R182H; this is a benign change (Polyphen)** | U:CC, A:CC, C:CT, Con:CC<br>U:GG, A:GG, C:GG, Con:GA                             |
|                  |                                         |              | IVS5, +166C>T                                   | rs614570                         | no change to splice site                                                                                            | U:CC, A:CC, C:CT, Con:CC                                                         |
|                  |                                         |              | IVS5, -118G>T                                   | n/a                              | T-616% increased binding of spliceosome at acceptor site                                                            | U:TT, A:TT, C: GT, Con:GG                                                        |
|                  |                                         |              | IVS10, +58T>C                                   | rs2273120                        | no change to splice site                                                                                            | U:CC, A:CC, C:TC, Con:CC                                                         |
| <i>TMEM14A</i>   | transmembrane protein 14A               | 5            | NOTHING FOUND                                   |                                  |                                                                                                                     |                                                                                  |
| <i>GSTA3</i>     | glutathione S-transferase A3            | 7            | NOTHING FOUND                                   |                                  |                                                                                                                     |                                                                                  |
| <i>GSTA4</i>     | glutathione S-transferase A4            | 7            | IVS5, -48C>G<br>IVS6, -87T>C<br>IVS7, +137C>A   | rs316133<br>rs375887<br>rs367836 | no change to splice site<br>no change to splice site<br>no change to splice site                                    | U:GG, A:GG, C:GG, Con:CC<br>U:CC, A:TT, C:CC, Con:TT<br>U:AA, A:AA, C:AA, Con:CA |
| <i>ICK</i>       | intestinal cell (MAK-like) kinase       | 13           | E7, c.815G>A                                    | n/a                              | CGA-R; CAA-Q; R272Q; change is probably damaging                                                                    | U:AG, A:AA, C:AG, Con:GG                                                         |
| <i>FBXO9</i>     | F-box protein 9                         | 13           | IVS1, -227C>T<br>IVS5, +61C>T<br>IVS10, +120A>G | n/a<br>rs17616311<br>n/a         | no change to splice site<br>T-16% increased binding by spliceosome at donor site<br>no change to splice site        | U:CT, A:CC, C:CC, Con:CC<br>U:CT, A:CC, C:CC, Con:CT<br>U:GG, A:GG, C:GG, Con:GG |
| <i>GCM1</i>      | glial cells missing homolog 1           | 6            | NOTHING FOUND                                   |                                  |                                                                                                                     |                                                                                  |
| <i>ELOVL5</i>    | elongation of long chain fatty acids    | 8            | IVS4, +49A>T                                    | n/a                              | no change to splice site                                                                                            | U:AT, A:AA, C:AT, Con:TT                                                         |

|      |                                              |    |                |            |                                                           |                            |
|------|----------------------------------------------|----|----------------|------------|-----------------------------------------------------------|----------------------------|
| GCLC | glutamate-cysteine ligase, catalytic subunit | 16 | IVS3, +101G>A  | n/a        | A-4% increased binding by spliceosome at acceptor site    | U:AG, A:GG, C:GG, Con:AG   |
|      |                                              |    | IVS4, +198G>A  | n/a        | no effect                                                 | U:AA, A:AA, C:AA, Con:AA   |
|      |                                              |    | IVS4, -110T>G  | n/a        | G-676% increased binding of spliceosome at acceptor site  | U:GG, A:GG, C:GG, Con:AG   |
|      |                                              |    | IVS4, -47G>A   | n/a        | A-50% decrease in spliceosome binding at acceptor site    | U:GG, A:GG, C:GG, Con:AG   |
|      |                                              |    | IVS11, -101G>A | rs17886117 | no change to splice site                                  | U: AG, A:AA, C:AG, Con: AG |
|      |                                              |    | IVS12, +83A>G  | n/a        | no change to splice site                                  | U:AG, A:AA, C:GG, Con:AG   |
|      |                                              |    | IVS12, -63G>A  | rs2066511  | A-31% increased binding to splicesosome at the donor site | U:GG, A:GG, C:GG, Con:GA   |

<sup>a</sup> Effect of amino acid changes were determined by "Polyphen: prediction of functional effect of human nsSNPs" website (<http://genetics.bwh.harvard.edu/pph/>) from the Bork and Sunyaev labs <sup>28</sup>

<sup>b</sup> Splice site changes were predicted by the "Automated Splice Site Analyses" website (<https://splice.uwo.ca/>) from the University of Western Ontario <sup>22</sup>

<sup>c</sup> U, unaffected sibling; C, obligate carrier; A, affected; Con, control outside Amish population

<sup>d</sup> There was no effect on splice site

Figure S1. Bar graph of the percentage (%) of cells with nuclear localization of the three different ICK constructs (wildtype ICK, R272Q mutant ICK, and vector control)

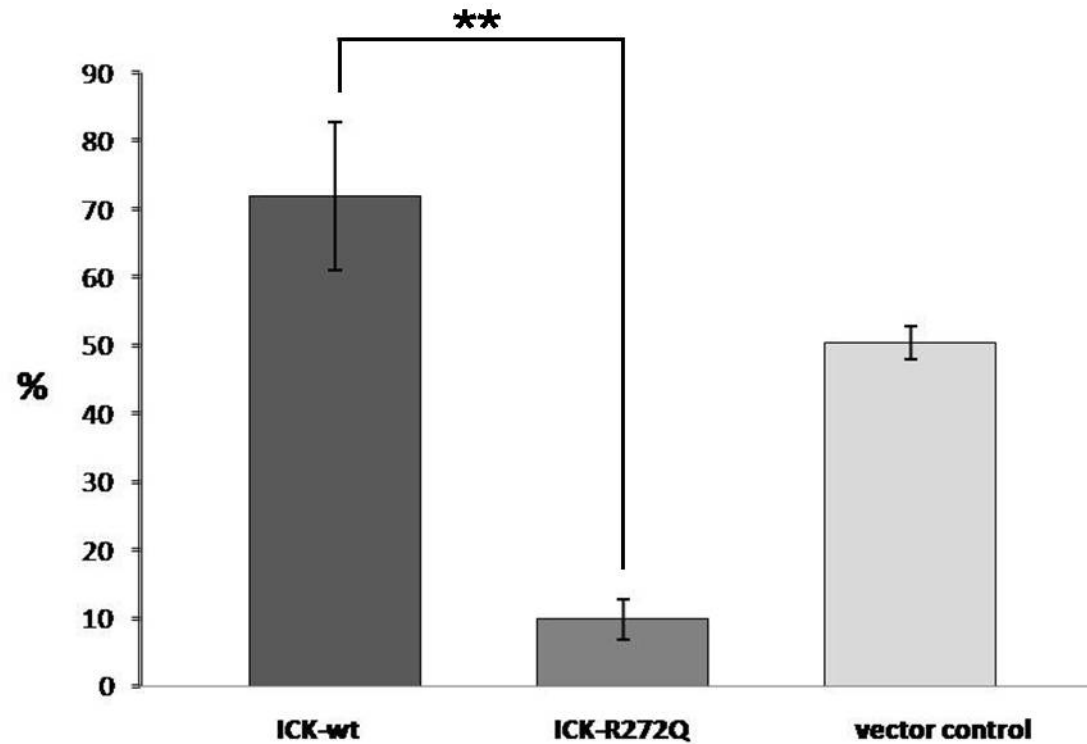

Bar graph of the percentage (%) of cells with nuclear localization of the three different ICK constructs (wildtype ICK, R272Q mutant ICK, and vector control). As demonstrated in the graph, the wildtype ICK and the R272Q mutant ICK protein localizes in the nucleus of 71.9% and 9.78% of the transfected cells, respectively. In total, 502, 501, and 501 transfected cells were counted per construct of wildtype ICK, R272Q mutant ICK, and control, respectively. Bar graph represents cells with nuclear localization  $\pm$  standard deviation (in %). \*\*OR (95% CI) = 23.62 (16.59, 33.62); chi-square p-value =  $3.9 \times 10^{-97}$ .
